# Supplementary material for: Cell-Autonomous and Non-cell-autonomous Function of Hox Genes Specify Segmental Neuroblast Identity in the Gnathal Region of the Embryonic CNS in Drosophila
Source: PubMed Central journal article supplement (PMC4807829; doi:10.1371/journal.pgen.1005961), 2016-03-25
Supplement: pgen.1005961.s005.pdf [file pgen.1005961.s005.pdf]

# D.melanogaster Ama + 3kb upstream - Genomic Relaxed EvoPrint

Black capital letters represent bases conserved in all species and colored bases represent sequences present in all species except *D.simulans* or *D.pseudoobscura*. Yellow labeled letters represent coding sequence of Amalgam.

Hox binding sites described in Affolter *et al.*, 1990, Ebner *et al.*, 2005, Joshi *et al.*, 2007 and Joshi *et al.*, 2010.

**xxx** binding site for **Exd/Dfd** GATTAATGG (TG) (TA)

**xxx** binding site for **Exd/Lab**  
 TGATGGATGG  
 TGATGCATG  
 TGATCAATTA

**xxx** binding site for **Scr** ATTAATG (similar to Dfd)

**xxx** binding site for **Antp**  
 CATTAGAC  
 CAATTACA

```

CGGAAGAGATGTAGAGATGgCACAAATGGCGGCCcTcCCTCGATGTtCaTTCTTTTGAGTAATTTaAAAAATCAAT 75
AAgCGTCTFAcaATAcATTtAGAcAAATatTTggacaTTTTATTTtAAATGTTtGCCTCTaATTTAAAAGTTtt 150
TAaTCGAACAGTACGGCAaaGCTGCAaaCcGatTgAGTgCAcAGcGTtTTCaCCAGgGGGCGtgaagAgAcAGCA 225
gTagaGAGCCCCCTGTGCGGcTGtATTgAaAGGTTGTGCTCaCTGCACaAAAGGTGAAtGTTCTAAaacGTCCGgA 300
GTTTATTTATTTtGtAGAgATTGcATTGAGAAaTAATAATAAAAaaAAAGCTTgAATATTgTAACAAaTAAGTAGA 375
aCCAATTAACcTTaaactCTTTGctCTGtTtGGAACTTCATAATAtTaAcAttTAAttAAcAAAAGGCcCCCA 450
AATtTAGGAAT AATT AAGTgTCGAA TgAATTTTTgTTAATATtATAAT TGTGCTcC 525
AGTCcagtccagCCTGAATTGAACAAAATGTGCACCTTTGTAGTTTATTcTGTTACATACTTcCGCTATTaataac 600
tacattattcaatccttaGTATCGCgagatatataaggacttGGGACAAAGAATAAGGATgTGGAGaTCgAGTTT 675
GTTTTCCAAatgATCTCaAACGgCTAcgTACGAAAGAAAATATCATATAATCGTTtGTAAgAcAGCaTATAGT 750
gcttgctatatgTACCTGttaGGCAGTGcATTATAAAATgTATtagAAgAATAaAGGTAAcCAGTGTGTCGAGTT 825
AaTTAgCTgTAGCGTTCgATTCTTTGttaaTTTTtttaagttggttactcatttcTGATgTTAAGCTAGGAT 900
TGGCaATTATTAttTcAGGCTCcATATTTGGAAAATTCGATATGTTTAGCGTtgAAGAATATTGTgtaaatc 975
tACAAgCATTAAGTGTGTCAGTGCATTGCCcAAGCTTTAAcATTTTAAAACACACCCAACGAGCCAGTTGACCT 1050
TTAAGCAAGTGTcCAAGGCCtTAAGTGAATATTTTTTAATGACATTTgCCaATAATgTcGTGTTTGTGTTTT 1125
GGGATcTGGCAGGAGCTTGTGCTGTTGCGGGcTTTGTCTGCTTCTGCGCTGCCAACTGGCAACAAAAGTCAA 1200
TTCAcAGAcACTCCAGTCGACGGAGTCGAGTGCAGCCAAAAGGCAAAACAATAACGtTCCATAGGCCAAAGCCC 1275
AAGGATACACACAAAGGTACAGTGGTgCTCTGACTACAAATACAAATTAACAGGgccagagctttaataccaa 1350
Ttcgataccattgcaacaacagatcttcaaatgctactttttatcatcagataaagataggtagaaaaggctata 1425
Tttacglttaaaggcaagctgatatttttagaaatttattcaaaaaaaaataattactttgacacataatattgt 1500
attagctcatctgactagaaactagaaatctctgaaatgtaacgaagttctgtgcatctctacAAATaTTAcAAAA 1575
AGTATCtgctagaTACCAGTGTGCGGAACtGGGCCACAAATTCaACCGAGTGTGTGACAAAGGACTTCcCCCTT 1650
CCCCGCTCGGCGACCCtGAATGCTGAATGCCCCCGTGTcTGCCGCTGCTGAAGCGAAACACCCAAAGAGTCACTG 1725
ACGAaAACAGGATTcGGGTAATAAATTACAAATTTGACATTTCTGTTTGGATCCGCTTGCcCTGAATCGCA 1800
CGGGCAGCCCTCTGTCGCACGCCCTcTAGCCCTcTTCTGTTCCGGTTTCCGGTGTGTGCTCCAGTTCCGTCGGG 1875
CCAAGTCGAGCGTTGCATGAAGCAGCCGACCTGcCAGGACCTGGACcAGGACCTGAACCTGCATCCAAgAGGCA 1950
TGCCCGCAATGGTCATAATGACCTGCCGGATGCAGTGAAGCaAAGGAGAGCCGtCaGTGGgcAGCgaGAAAG 2025
GGAGGAATGAAGCGCCCTATGcGGTCCGttGATAGTTAACTGAAATTTATTTTACCAATTTTACAAATTA 2100
TCTGATTCGAATGTGCATCAGcGACGAGGATTCGGCCAGATGGGcAGTACGAGTGAAGTCCGGGggTCCaAGt 2175
TCGGACGACAGATGCAGTGTcCTCCCATGGGAACGGCCcATTTCAGCAGAAGTCACCgAAACGATTTAAGATG 2250
TGATTTAATTTCCAGAAACTGTGGCCATAGTTTCTGTCCTCTTCCGGGGAATTTCTTCGCCAGACAGACAGCGT 2325
CGTCATCAATCATCTcGCAGAGTAAAGCCGGTTAACCTCGATGGGTTTGGGGGAaACTTGGCCCGGGGCTGA 2400
TCAGGAaTCaGGCTGGAAATGAAAATTAATGCGTTTGGGCaGCAGAAAAGTTTTCGAATGGTTCGGTGTCTAT 2475
ACAACAAGTGAAaTTTTgCAcATcAAaCGgcccTTTGACCACaTTTAATCtTTAAATCAcCTGCCATAGgAACTAA 2550
TTGATCGAGATCCAGACAcATtAAAcaCATcAATATAtATacacaAAATAATCAAtATAgACTATGTTATAT 2625
TTcgacgttttccctatcctcgtatgctgtGAGTACACATATTAACCtTCAGCCGTgTAAAGAAATTTCTAcGAACA 2700
GCCAAGTTAAAGGTacCCAATTTCCCGAATaCTGCTCTTTAAATATCCtTCAGAAATTTCCAGCATGGCTGAAC 2775
CAGGACTCGATTCAAGTcCACCCCAATGCCTTGTaCACCACCCgTTGTTTTGcCTTTTCGCGCATGCGCCCTC 2850
GCTCCGGCGCAAAAGAGACAGCACTAAAGAGACGGCGCTGGATCGCTGGCATTTCAGAGCGGctAGGATATTC 2925
CAGGCAAGCTCGTaaTCGTTGCTGTTGTTGTTAGCCGCCAGCGGAAAGTAGtGCGCCATGCCTAAATCAcACA 3000
AATGGGTAGAGTTCCACTTTCCACCCcGCCGctGCTCTTTTaTTGCTTCCAGAACCCCAACGTTTAT 3075
GGCCAAATGGCGGCAGaATTTGAATTTGAATTTGCGcACGCGGCTCTcAGTTCGCTGCGGCCGCTTTTCGCTGG 3150
CGCTTTGTTTTGCACTGACGCTTATCTTGGGGCGGGGCTGTCAAGTGGGcgGGGCAGaGGGCCaAGGCAc 3225
GAGGCAaTAACaACAGCAGCGAGcAGCAAAAACAATCAATTAAGACCAAGAAAGTGCATTGATAACTGAGC 3300
CCGAAGTCAAACTCAGCACAAGTAAACAATTTAAATACGAaCTaAAATGCAAAACAGATACAAAATACAGATA 3375
GAGATACTGAACAAACACAGATACAAATACTGTGAAGGCGACAAAGTACATAACCGAGGGGTGATAAGATCCAAA 3450
ACGTCTAGACTTCTTCACTCGGCAATACACTGAAAAAAGCTGtTACTaATTATTAaAAATATG-AAATAATA 3525
AAAGGTAaaCTATTTTTtttactaacttttaactatttactaactgcccATTAAATCTTTTTTCACATC 3600
TTAACTACAaAAAAATtAAtTTTAAATCAATTTGATtCGTTTTACCTGgCTATTCAtTaaaAAAAAAAAtAAGTA 3675
tTGATATATCgAAAAcTAAAGTTATCTccgTTTTTaccAGTGTATcCATTaGAAGCAACGTTGTCTAGACACAG 3750
CCGCGTAAATCAATCAATAGgTGTCTATCTGCTcTcATTCCTCGGGGTACAAAATTTCCGGACTTTCCTTGAGAA 3825
ACCGAGCCaTCGACGTGCGCGCTCAGGAAGAATACaAAAAtAAGAACcCGATTCTCAGaCCTCAGCAGAGATA 3900
    
```

CGGATTTTGTAGCCGAGCTCGGTCGCCTCTTCAATTCAGTCGAGTCCCGAACGCGAAGTGAAGCGCATTGAACC 3975  
CACAttgaaactgaGAGATAGTCGAGGAAAAAGAGTCAAAAATCAACAGCAACATCCTGTAAATAAACAGAAAAG 4050  
TATGAATTATATTTAAAAAAGACGATAAAgCTGaaAAGTGTGTaCaAGCtTTATAAATGTTTCAAAACGAGTGTG 4125  
TGTGCAGAAATTCCTTTCcttcttatttacttttgaagataactttTAAAGATATACTTGTGAcCTTtAAATTATTA 4200  
TTCTATAaTTGAACcTAGTTTTAGTTTTATATATGAATTCGAAGATGGGTAAAaatgGCAGTTCTCATTACA 4275  
TACGAAATATTTAGAATGGCTAAcGCCATCAAAGACTCAACATAAAGTGATACACTaaTAAATCTCAAATCTAT 4350  
TTTGATTCTTACAGACCAGACATGGCGCGTCTGCGGCTTtAATCGGTCTTATAtTCTGCCTTGCGATCAGCtT 4425  
GGAtTCGGTGCCTtGTGCCCAAGTATCAGCCAATCAgCAAGGACGTGGTGGCCAGTGTGGCGACTCTGTGGA 4500  
GTCAACTGCACcGTGGAGGAGTGGGAAGCCTCTCGGTGAGcTGGGCCAAGCGTCCCAGCGAGTCGGACACCAA 4575  
CTCGGTGTGTCTTCCATGCGGAATATcCTCAGTCTGCCGACcAGCGGTACAACGTAAcGGTCACCGAAGGACC 4650  
CAAGACCgGAAGTGCCATtTACACCTTCCGCATTcAGAACATCGAAGTCAgTGACATGGGTCCGTACGAGTtCA 4725  
GGTGCTtGTTTCGGCCACGGAGAGGTgACCAAGAAGCTGAGcCTGCAGATCAAGACCCCGCCGTGATTGCGGA 4800  
GAACACCcCCAAGAGcACCCTGGTgACgAGGGaCAGAATCTGGAGCTGACCTGCCATGCCAATGGCTTTCCCAA 4875  
GCCtACGATCTCCTGGGCGCGGAcATAATGCaGTGATGCCtGCCGGtGGCCATTTGCTGGCgGAACCAACTCT 4950  
CCGGATTCGtTCCGTGCACCGcATGGATCGCGGcGGCTACTACTGCATCGCGCAGAACGGAGAGGGCCAGCCGGA 5025  
CAAGAGGTtGATCCGGGTGGAaGTGGAGTCCGTCCGCAGATTGCCGTcCAGAGcCCAAGATCGCCCAATGgT 5100  
GTCCCAcTCCCGGAGCTGGAGTGTCTCCGTGCAGGGCTACCCGcCTCCGACTGTAGTTTGGCACAAgAAATGGCGT 5175  
GCCCTGCAGTCTAGCCGGcCACcACGAGGTGGCCAACCCGCCCTCCTCGGGAACCACAACCTCTGTCTGCGG 5250  
CATCGAaAGCGTgCGCAGGAGGACTtGGGACTACTACTGCAATGCCACCAATaAGCTGGGAcACGCCGATGC 5325  
GCGACTGCATCTTCCAGACCCTCATcCCAGTGCCTCCTtTCGTAaTAAGCCCTCAACGTCTGATTCCATT 5400  
CCCACGCAACAAAGACTGGAACCCtCACTTTcCTCTCGtCTCGCTTTTTTCGGCAATTCGCCAGTCCGGATGGG 5475  
tCTGTGTTTATATTtTTAATGcATTTCATtCAATTAGCTCCATTAGACTTCATTATTTTCGGACACACTTGAGAT 5550  
CGAGCCACCcCTTGTGCCTTATGAATTTTGTCTGCATCCGTCCGCTtGTGCAAAcACATTAATATGCTTAAG 5625  
TAATAAAcGTTCTCTGATAAAcTTAATCGGTCTTTTCTATGTGGTTGGGTTGGCTTGATACGGtGTAAAGTTA 5700  
aATACCAcAGAGaATAAAcACCTCTTgaAGCaACgaatTAAAGGGTTTGTcATTCAATAAAACTAAGCcAGGAG 5775  
AcAAGcCATTGtCAAAAGT 5850

**Affolter, M., Percival-Smith, A., Müller, M., Leupin, W. and Gehring, W. J. (1990).**  
DNA binding properties of the purified Antennapedia homeodomain. *Proc Natl Acad Sci U S A* **87**, 4093-4097.

**Ebner, A., Cabernard, C., Affolter, M. and Merabet, S. (2005).** Recognition of distinct target sites by a unique Labial/Extradenticle/Homothorax complex. *Development* **132**, 1591-1600.

**Joshi, R., Passner, J. M., Rohs, R., Jain, R., Sosinsky, A., Crickmore, M. A., Jacob, V., Aggarwal, A. K., Honig, B. and Mann, R. S. (2007).** Functional specificity of a Hox protein mediated by the recognition of minor groove structure. *Cell* **131**, 530-543.

**Joshi, R., Sun, L. and Mann, R. (2010).** Dissecting the functional specificities of two Hox proteins. *Genes Dev* **24**, 1533-1545.
